# Supplementary material for: Immediate and long-term outcomes after treat-all among people living with HIV in China: an interrupted time series analysis
Source: PubMed Central journal article supplement (PMC10424386; doi:10.1186/s40249-023-01119-7), 2023-08-14
Supplement: 40249_2023_1119_MOESM1_ESM.pdf [file 40249_2023_1119_MOESM1_ESM.pdf]

## Appendix

### Description of the back-calculation method

Previous studies have demonstrated, through laboratory-based research, that the levels of CD4 and viral load in HIV-infected individuals exhibit an inverse relationship over time, revealing the natural disease progression from HIV infection to clinical symptoms [1]. However, due to delayed diagnosis in most HIV-infected individuals, CD4 changes after HIV infection cannot be observed immediately. Therefore, based on the decline of CD4 over time in HIV-infected individuals, we used the square root of CD4 to fit the relationship between CD4 and time, constructing a CD4 elimination model to estimate the time of HIV infection of PLHIV.

### Formula for back-calculation method based on the CD4 elimination model parameters

*Linear elimination relationship between the square root of CD4 and the duration of infection based on a linear mixed effects model fitted to the pattern of CD4 decline over time prior to ART initiation*

$$\sqrt{CD_4(T_i)} = a_i + (b_i \times T_i) + e_{it}$$

Where  $T_i$  is the time interval between the date of HIV infection and the first CD4 test,  $e_{it}$  is the random error.

*Calculating the estimated time from infection to diagnosis, based on CD4 elimination model fitted using HIV/AIDS data in the National AIDS Case Report Database in China*

$$T_i = \frac{\sqrt{\text{first}CD_4} - a_i}{b_i}$$

**Additional file 1 Table S1 Estimates of the random intercept and random slope of the CD4+ T-cell elimination model, based on the CD4 elimination model parameters estimated from HIV/AIDS data in the National AIDS Case Report Database in China [2]**

| Gender | Age group | Route of transmission | Estimated value of intercept (95% CI) | Estimated value of slope (95% CI) |
|--------|-----------|-----------------------|---------------------------------------|-----------------------------------|
| Male   | 15-24     | Homosexual            | 24.84(23.76, 25.92)                   | -1.31(-1.33, -1.25)               |
|        | 25-34     |                       | 23.94(22.86, 25.02)                   | -1.37(-1.40, -1.33)               |
|        | 35-44     |                       | 23.44(21.91, 24.96)                   | -1.53(-1.58, -1.47)               |
|        | >45       |                       |                                       | -1.59(-1.68, -1.51)               |
| Male   | 15-29     | Heterosexual          | 24.42(22.64, 26.20)                   | -1.21(-1.24, -1.18)               |
|        | 30-39     |                       | 23.17(21.25, 25.09)                   | -1.27(-1.30, -1.24)               |
|        | >40       |                       | 24.04(21.28, 26.80)                   | -1.48(-1.51, -1.44)               |
| Female | 15-29     |                       | 23.80(21.49, 26.12)                   | -1.22(-1.25, -1.19)               |
|        | 30-39     |                       | 22.55(17.73, 27.37)                   | -1.27(-1.31, -1.23)               |
|        | >40       |                       | 22.62(20.37, 24.88)                   | -1.46(-1.50, -1.41)               |
| Male   | 15-29     | Others                | -1.18(-1.24, -1.12)                   | -0.88(-0.91, -0.84)               |
|        | 30-39     |                       | -1.12(-1.17, -1.07)                   | -0.93(-0.97, -0.90)               |
|        | >40       |                       | -1.06(-1.14, -0.98)                   | -1.00(-1.05, -0.94)               |
| Female | 15-29     |                       | -1.17(-1.30, -1.03)                   | -0.98(-1.06, -0.90)               |
|        | 30-39     |                       | -1.05(-1.17, -0.93)                   | -1.04(-1.13, -0.95)               |
|        | >40       |                       | -0.87(-1.04, -0.69)                   | -1.17(-1.34, -1.00)               |

### Formula for Poisson and quasi-Poisson segmented regression models

*Calculating the change in outcome at “treat-all”, unadjusted for seasonality*

$$\log Y_t = b_0 + b_1(t - T) + b_2x + b_3x(t - T)$$

Where  $Y_t$  is the outcome variable at time  $t$ ,  $t$  represents the elapsed time in months since the start of the study,  $x$  is a dummy variable indicating the implementation of “treat-all” policy, and  $T$  is the center time.

*Calculating the change in outcome at “treat-all”, adjusted for seasonality*

$$\log Y_t = b_0 + b_1(t - T) + b_2x + b_3x(t - T) + b_4 \sin\left(\frac{2\pi t}{12}\right) + b_5 \cos\left(\frac{2\pi t}{12}\right) + b_6 \sin\left(\frac{4\pi t}{12}\right) + b_7 \cos\left(\frac{4\pi t}{12}\right)$$

Where  $\sin\left(\frac{2\pi t}{12}\right)$ ,  $\cos\left(\frac{2\pi t}{12}\right)$ ,  $\sin\left(\frac{4\pi t}{12}\right)$ ,  $\cos\left(\frac{4\pi t}{12}\right)$  are two sine and cosine pairs of Fourier terms used to adjust the seasonality.

*Counterfactual model, unadjusted for seasonality*

$$\log Y_t = b_0 + b_1(t - T)$$

*Counterfactual model, adjusted for seasonality*

$$\log Y_t = b_0 + b_1(t - T) + b_4 \sin\left(\frac{2\pi t}{12}\right) + b_5 \cos\left(\frac{2\pi t}{12}\right) + b_6 \sin\left(\frac{4\pi t}{12}\right) + b_7 \cos\left(\frac{4\pi t}{12}\right)$$

## Sample R code for Poisson and quasi-Poisson regression models, using proportions of 30-day ART initiation as an example

```
# Load packages
```

```
library(tsModel)
```

```
library(tidyverse)
```

```
library(sandwich)
```

```
library(dplyr)
```

```
library(qcc)
```

```
# Centre time
```

```
list2$time_c <- list2$n - 18 # Time centered at the first month of “treat-all”
```

```
list2$time_e <- list2$n - 60 # Time centered at the end of 2019
```

```
# Overdispersion test
```

```
qcc.overdispersion.test(list2$x)
```

```
# Quasi-Poisson regression model of proportions of 30-day ART initiation without adjusting for seasonality
```

```
model_time <- glm(x ~ interruption + n + interruption:time_c, family = quasipoisson, list2)
```

```
summary(model_time)
```

```
# Calculated the impact of “treat-all” at the end of 2019 without adjusting for seasonality
```

```
model_time_end <- glm(x ~ interruption + n + interruption:time_e, family = quasipoisson, list2)
```

```
summary(model_time_end)
```

```
# Look at residuals for autocorrelation
```

```
acf(residuals(model_time, type = "deviance"))
```

```
pacf(residuals(model_time, type = "deviance"))
```

```
acf(residuals(model_time_end, type = "deviance"))
```

```
pacf(residuals(model_time_end, type = "deviance"))
```

```
# Calculate Newey-West standard errors, with the lag taking the optimal value calculated
```

```
est <- exp(c(coef(model_time)["interruption:time_c"], coef(model_time)["interruption"], coef(model_time)["n"]))
```

```
se1 <- sqrt(diag(NeweyWest(model_time, prewhite = F))["interruption:time_c"])
```

```
se2 <- sqrt(diag(NeweyWest(model_time, prewhite = F))["interruption"])
```

```
se3 <- sqrt(diag(NeweyWest(model_time, prewhite = F))["n"])
lb <- est * exp(-1.96 * c(se1, se2, se3))
ub <- est * exp(1.96 * c(se1, se2, se3))
table <- cbind(round(est, digits = 3), round(lb, digits = 3), round(ub, digits = 3))
table
```

```
# Calculate trend and confidence intervals after “treat-all”
```

```
V <- NeweyWest(model_time, prewhite = F)
se <- sqrt(V["n", "n"] + V["interruption:time_c", "interruption:time_c"] + 2 * V["n", "interruption:time_c"])
slope_post <- sum(coef(model_time)[c("n", "interruption:time_c")])
lower <- slope_post - 1.96 * se
upper <- slope_post + 1.96 * se
round(exp(cbind(slope_post, lower, upper)), 3)
```

```
# Quasi-Poisson regression model of proportions of 30-day ART initiation adjusting for seasonality
```

```
model_time_sea <- glm(x ~ interruption + n + interruption:time_c + harmonic(month, 2, 12), family = quasipoisson, list2)
summary(model_time_sea)
```

## References

1. Fauci, A.S., et al., Immunopathogenic mechanisms of HIV infection. *Annals of Internal Medicine*, 1996. 124(7): p. 654-663.
2. Tang, L., Estimating the trend of new HIV infections in Honghe Prefecture, Yunnan Province based on the back-calculation method. 2020, Chinese Centre for Disease Control and Prevention.
